# Supplementary material for: The Effect of Preservative and Temperature on the Analysis of Circulating Tumor DNA
Source: Oxford University Press journal article supplement (doi:10.1158/1078-0432.ccr-16-1691), 2016-11-09
Supplement: 10780432ccr161691-sup-168643_1_supp_3689645_jjht6x.xlsx [file 10780432ccr161691-sup-168643_1_supp_3689645_jjht6x.xlsx]

## Sheet: Suppl. Table 1
Supplementary Table 1. Summary of clinical characteristics, plasma volume and DNA yield in 15 cancer patients.
						K2EDTA - Day 0			BCT Streck™ - Day 0
Sample ID	Mutation Present	Mutant Allele Frequency at Day 0 (%)	Tumor Type	Histology	Tumor Stage	Total Volume Plasma (mL)	Total Plasma DNA Yield (ng)	Total Observed Genomes/mL	Total Volume Plasma (mL)	Total Plasma DNA Yield (ng)	Total Observed Genomes/mL
P1	KRAS p.G12A	0.173075	Colon	Adenocarcinoma	4	4	84.8	3547.5	4	65.6	2746.5
P2	KRAS p.G12V	0.313763	Rectal	Adenocarcinoma	4	4	245.52	4547.5	5	271.04	3148
P3	KRAS p. G12C	0.363282	Rectal	Adenocarcinoma	4	4	121.44	2455.5	5	161	4108
P4	KRAS p.G12V	0.36586	Colon	Adenocarcinoma	4	3.25	275.52	15932.3	3.75	201.6	11184
P5	KRAS p.G12V	0.187053	Rectal	Adenocarcinoma	4	3.6	128.52	5620	4.25	144.48	5016.47
P6	KRAS p. G12C	0.00823585	NSCLC	Adenocarcinoma	3a	2	32.928	1421.7	3	46.536	1340.33
P7	KRAS p.G12D	7.49651e-05	Colon	Adenocarcinoma	4	3.5	982.8	39660	4.4	1117.2	30929.7
P8	KRAS p.G12V	0.000718965	Colon	Adenocarcinoma	4	2	51.912	2503.6	3.2	59.976	1438.25
P9	BRAF p.V600E	0.00217043	Colon	Adenocarcinoma	4	4	74.088	3630.5	5	78.456	2123.2
P10	KRAS p.G12A	0.14805	Colon	Adenocarcinoma	4	3	82.824	4235.33	5	58.968	3015.2
P11	EGFR E746_A750del	0.641042	NSCLC	Adenocarcinoma	4	4	87.74	99475	4.5	100.04	91462.2
P12	KRAS p. G12D	0.0010055	Rectal	Adenocarcinoma	4	3	619.92	3291.47	4	644.52	2536.05
P13	KRAS p. G12D	0.048	Colon	Adenocarcinoma	4	3	66.42	3088	3.2	75.44	3513.75
P14	KRAS p.G12A	0.12	Colon	Adenocarcinoma	4	6	301.76	5586.67	6.5	365.72	6489.54
P15	KRAS p.G12V	0.51	Colon	Adenocarcinoma	4	5	6740.4	147480	5.5	3673.6	119309
