# Supplementary material for: The Effect of Preservative and Temperature on the Analysis of Circulating Tumor DNA
Source: Oxford University Press journal article supplement (doi:10.1158/1078-0432.ccr-16-1691), 2016-11-09
Supplement: 10780432ccr161691-sup-168643_1_supp_3689648_88ht6y.xlsx [file 10780432ccr161691-sup-168643_1_supp_3689648_88ht6y.xlsx]

## Sheet: Suppl. Table 4
Supplementary Table 4. Genes Included in the Plasma Panel for Detection of Somatic Alterations by Next-Generation Sequencing
Gene Name
ABL1
AKT1
ALK
APC
AR
ATM
BRAF
CDH1
CDK4
CDK6
CDKN2A
CSF1R
CTNNB1
DNMT3A
EGFR
ERBB2
ERBB4
ESR1
EZH2
FBXW7
FGFR1
FGFR2
FGFR3
FLT3
GNA11
GNAQ
GNAS
HNF1A
HRAS
IDH1
IDH2
JAK2
JAK3
KDR
KIT
KRAS
MAP2K1
MET
MLH1
MPL
MYC
NPM1
NRAS
PDGFRA
PIK3CA
PIK3R1
PTEN
PTPN11
RB1
RET
SMAD4
SMARCB1
SMO
SRC
STK11
TERT
TP53
VHL
