# Supplementary material for: The Effect of Preservative and Temperature on the Analysis of Circulating Tumor DNA
Source: Oxford University Press journal article supplement (doi:10.1158/1078-0432.ccr-16-1691), 2016-11-09
Supplement: 10780432ccr161691-sup-168643_1_supp_3689654_22ht2t.docx [file 10780432ccr161691-sup-168643_1_supp_3689654_22ht2t.docx]

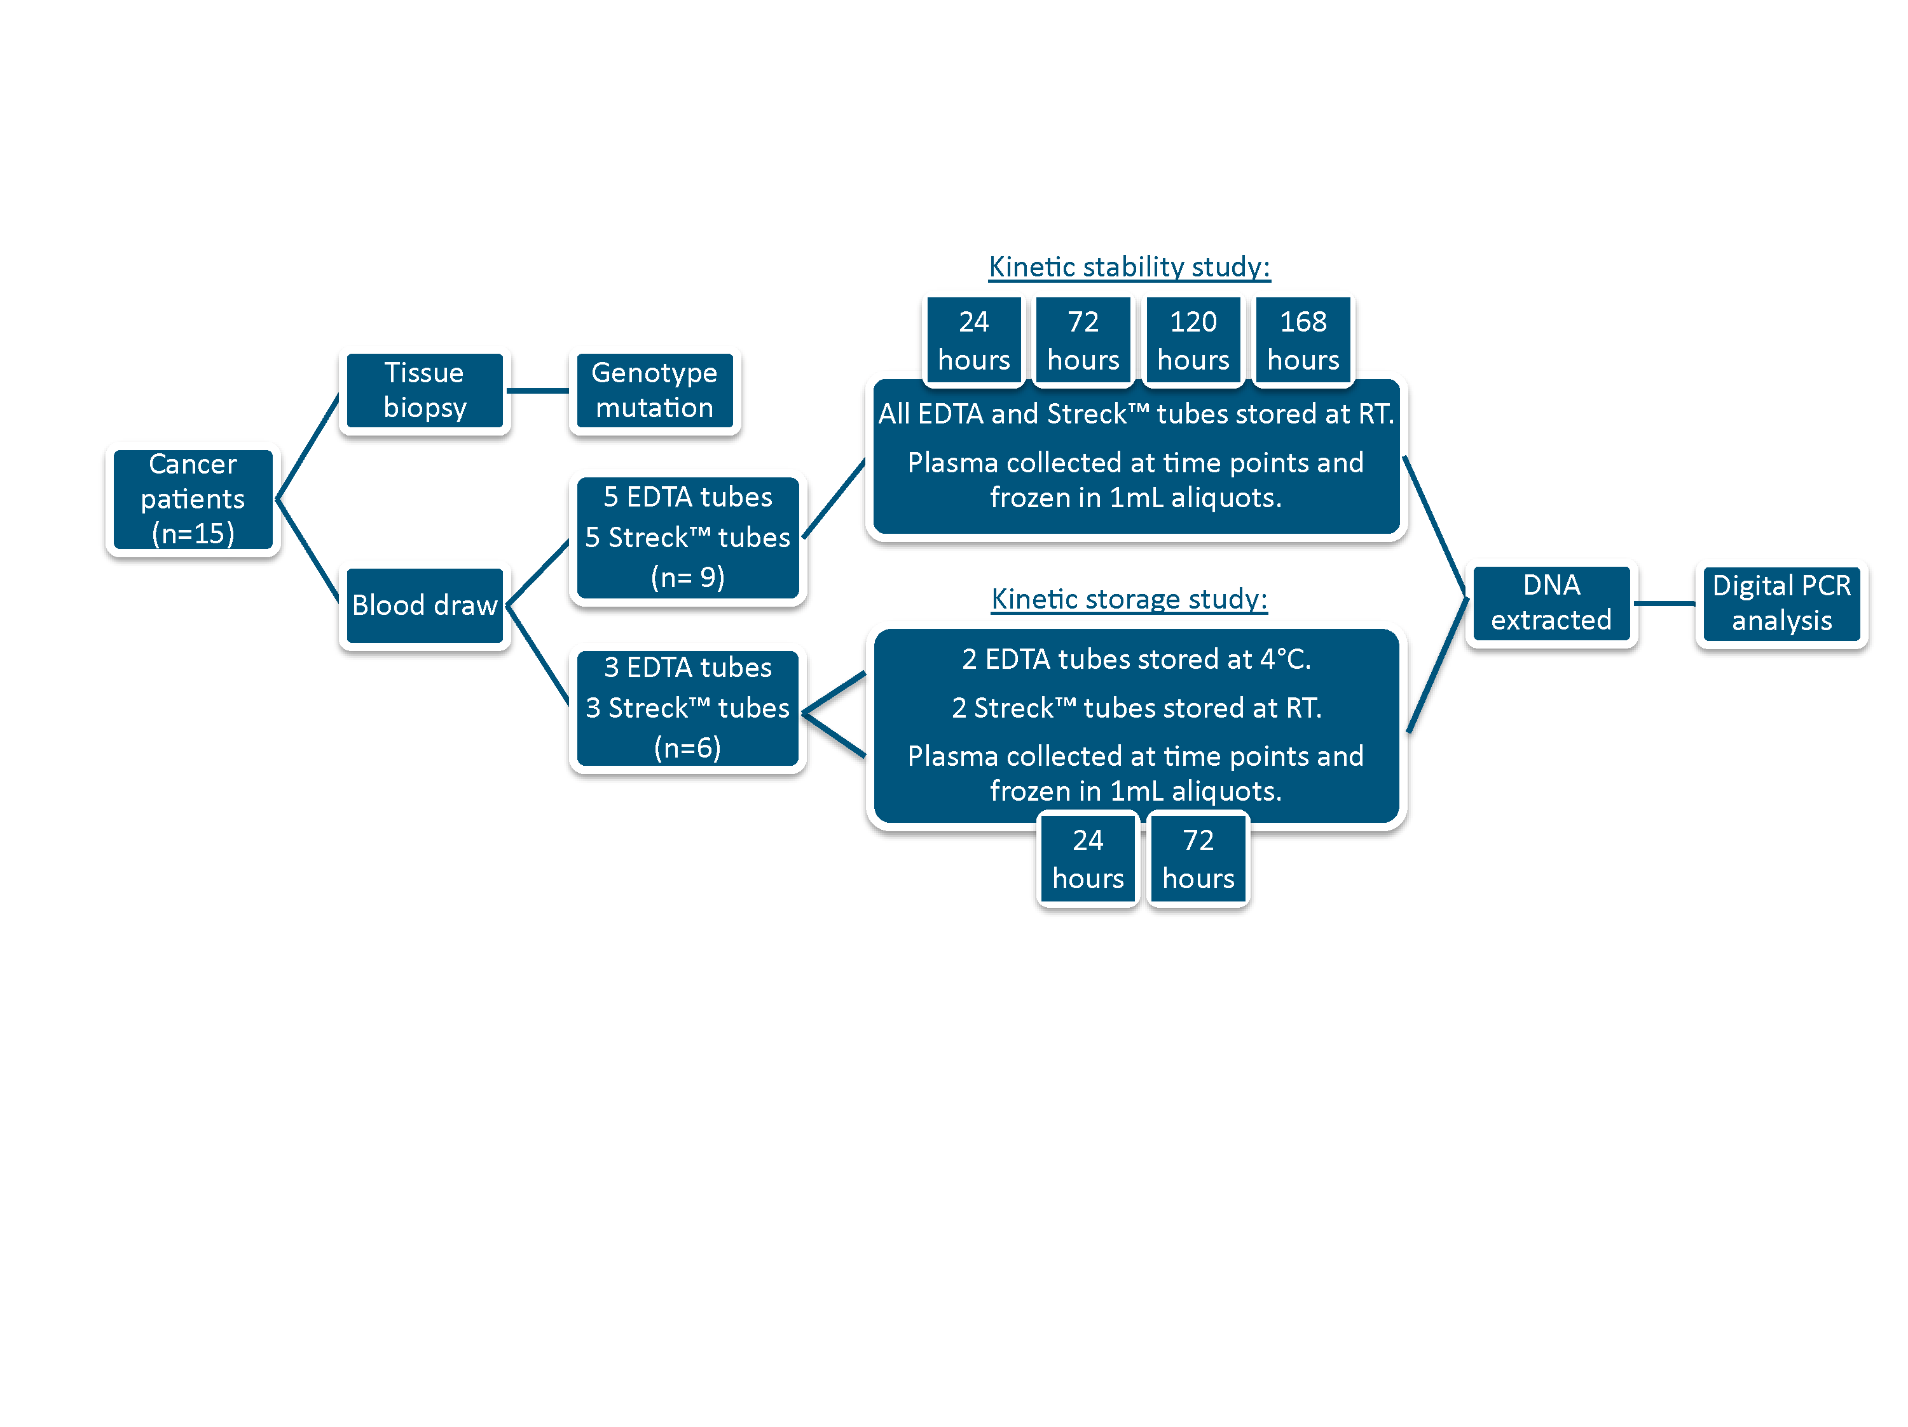


**Suppl. Figure 1.** **Schematic of sample collection and analyses for the comparative studies between K2EDTA (EDTA) and Streck™ BCT (Streck™) tubes**. 15 cancer patients gave informed consent to participate in this study. Each patient’s tumor was genotyped as part of standard care and contained a *KRAS* or *EGFR* mutation. Peripheral blood from 9 patients was drawn in 5 EDTA and 5 Streck™ tubes and plasma was collected at 5 time points spanning a one week period. Peripheral blood from 6 patients was drawn in 3 EDTA and 3 Streck™ tubes to assess storage conditions of the Vacutainers. Plasma was collected and frozen from one EDTA and one Streck™ tube within 4 hours of the blood draw and used as the reference time point. The remaining tubes were split into two groups, the two EDTA tubes were placed at 4°C while the Streck™ tubes were held at room temperature then plasma was collected and frozen from one tube of each type at 24 and 72 hours. Once all time points were collected, DNA was extracted and analyzed using droplet digital PCR. RT: room temperature.
